# Supplementary material
Source: PubMed Central journal article supplement (PMC6601329)
Supplement: NIHMS1031092-supplement-1.pdf [file NIHMS1031092-supplement-1.pdf]

Supplementary materials Tarafder S., 2018

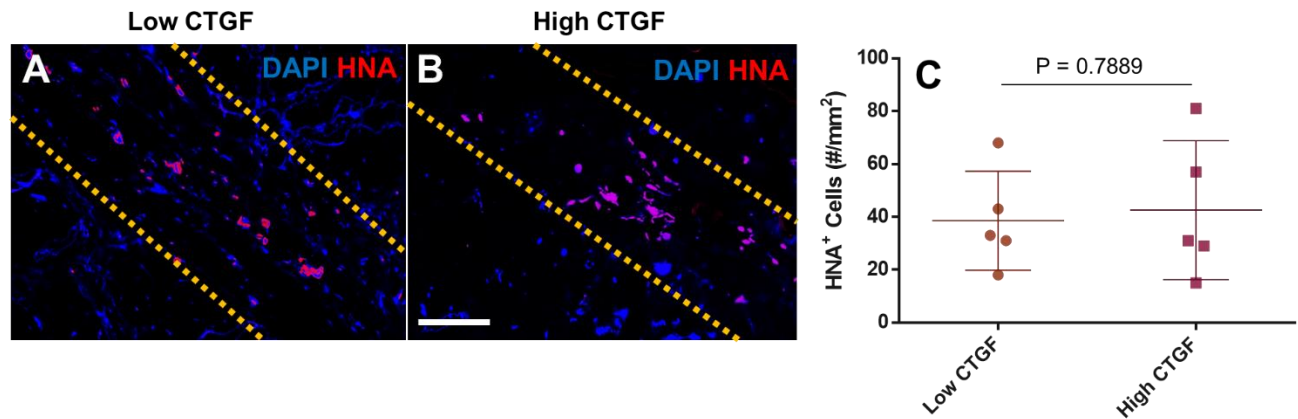

**Supplementary Figure 1.** Human nucleus antigen staining showing recruitment of human MSCs into the defect site without a difference between the low and high doses of CTGF (**A**) (scale = 100  $\mu$ m). There was no statistically significant difference between the high and low CTGF doses (**B**) (n = 5 per group).

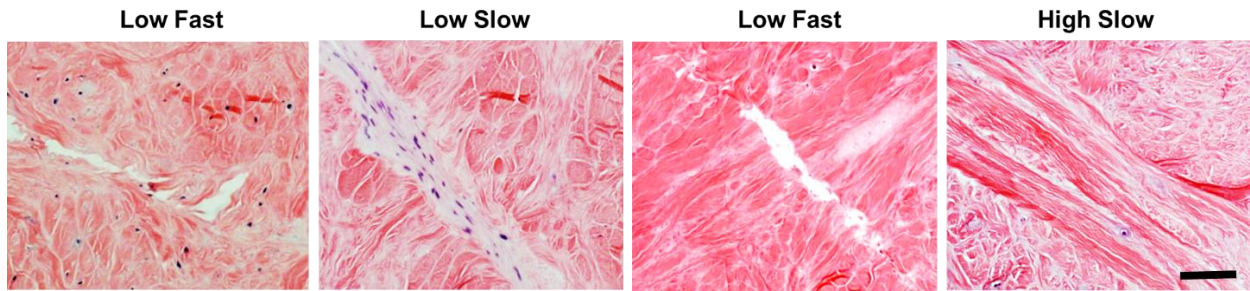

**Supplementary Figure 2.** High magnification of healed menisci in H&E. Cellularity was higher in the low CTGF dose and slow TGF $\beta$ 3 release as compared to the other group. The high CTGF dose and slow TGF $\beta$ 3 release show a low cellularity but with dense integration and rounded fibrochondrocyte-like cells. Scale = 50  $\mu$ m.

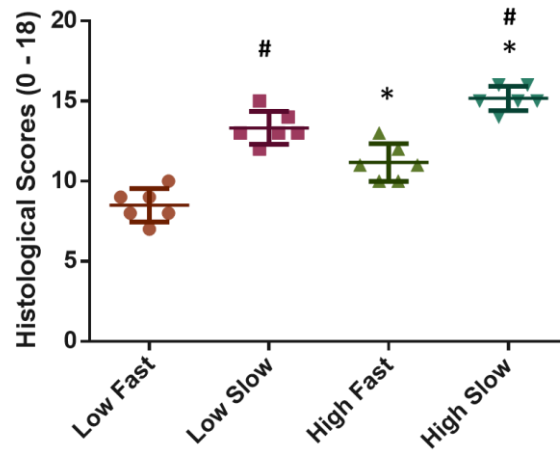

**Supplementary Figure 3.** Histological scores for healed menisci (n = 6 per group; \*:p<0.001 compared to low dose; #: p<0.001 compared to fast).
